# Supplementary material for: Lipid Dys-Homeostasis Contributes to APOE4 Associated AD Pathology
Source: Preprints.org preprint supplement (doi:10.20944/preprints202209.0235.v1), 2022-09-16
Supplement: Supplementary file 1 [file supplementary]

Table S1

|  | Mean of APOE3 | Mean of APOE4 | Difference | SE of difference | t ratio | P value | q value |
| --- | --- | --- | --- | --- | --- | --- | --- |
| Cyp27a1 | 2,944 | 2,664 | 0,2799 | 0,2421 | 1,156 | 0,268488 | 0,563205 |
| Cyp46a1 | 262,9 | 184,8 | 78,16 | 14,63 | 5,344 | 0,000133 | 0,00364 |
| Dhcr24 | 216,2 | 219,4 | -3,149 | 9,592 | 0,3282 | 0,747961 | 0,784496 |
| Dhcr7 | 37,81 | 33,52 | 4,289 | 1,755 | 2,443 | 0,029584 | 0,100845 |
| Hmgcr | 136,6 | 147,7 | -11,13 | 10,3 | 1,08 | 0,299649 | 0,565188 |
| Hsd3b7 | 6,348 | 4,963 | 1,385 | 0,3935 | 3,518 | 0,003778 | 0,025758 |
| Cpt1a | 31,12 | 29,74 | 1,374 | 3,008 | 0,4566 | 0,655478 | 0,744787 |
| Cpt1c | 106,2 | 105 | 1,176 | 5,968 | 0,1971 | 0,846786 | 0,855254 |
| Cpt2 | 4,608 | 4,103 | 0,505 | 0,3539 | 1,427 | 0,177202 | 0,4393 |
| Cptp | 21,38 | 19,47 | 1,906 | 1,009 | 1,889 | 0,081435 | 0,246749 |
| Dag1 | 100,9 | 104,7 | -3,896 | 5,43 | 0,7175 | 0,485759 | 0,637388 |
| Degs1 | 54,58 | 52,84 | 1,739 | 1,65 | 1,054 | 0,310884 | 0,565188 |
| Degs2 | 4,007 | 3,852 | 0,1547 | 0,3722 | 0,4155 | 0,684531 | 0,746687 |
| Elovl1 | 9,113 | 9,089 | 0,02422 | 0,7068 | 0,03427 | 0,97318 | 0,947808 |
| Elovl2 | 15,32 | 17,06 | -1,746 | 1,301 | 1,343 | 0,202356 | 0,459853 |
| Elovl4 | 65,49 | 63,17 | 2,32 | 3,143 | 0,7381 | 0,473539 | 0,637388 |
| Elovl5 | 72,94 | 60,79 | 12,16 | 4,486 | 2,71 | 0,017853 | 0,081142 |
| Elovl6 | 53,66 | 57,28 | -3,626 | 5,324 | 0,681 | 0,50781 | 0,637388 |
| Elovl7 | 12,8 | 17,89 | -5,086 | 2,062 | 2,466 | 0,028326 | 0,100845 |
| Fads1 | 265,6 | 275 | -9,462 | 14,11 | 0,6706 | 0,514211 | 0,637388 |
| Fads2 | 117,2 | 114,2 | 3,052 | 5,001 | 0,6102 | 0,552245 | 0,65477 |
| Fads3 | 38,14 | 34,6 | 3,54 | 2,356 | 1,503 | 0,156825 | 0,427661 |
| Pemt | 1,526 | 1,082 | 0,4438 | 0,2646 | 1,677 | 0,117387 | 0,331971 |
| Pcyt1a | 44,48 | 47,52 | -3,04 | 3,159 | 0,9623 | 0,353473 | 0,60245 |
| Pcyt1b | 55,56 | 64,46 | -8,897 | 2,397 | 3,711 | 0,002613 | 0,023753 |
| Pcyt2 | 68,64 | 53,8 | 14,84 | 3,552 | 4,179 | 0,001081 | 0,014744 |
| Scd1 | 198,3 | 245,6 | -47,35 | 16,29 | 2,907 | 0,012254 | 0,066833 |
| Scd2 | 1470 | 1538 | -68,22 | 85,47 | 0,7981 | 0,439133 | 0,637388 |
| Scd3 | 4,96 | 5,443 | -0,4824 | 0,5706 | 0,8455 | 0,413149 | 0,637388 |
